# Supplementary material for: Backed Pieces and Their Variability in the Later Stone Age of the Horn of Africa
Source: Springer Nature journal article supplement (doi:10.1007/s10437-020-09401-x), 2020-09-01
Supplement: MOESM1 [file 10437_2020_9401_MOESM1_ESM.pdf]

# Backed pieces and their variability in the Later Stone Age of the Horn of Africa

Alice Leplongeon<sup>1,2,3\*#</sup>

Clément Ménard<sup>4\*#</sup>

Vincent Bonhomme<sup>5</sup>

Eugenio Bortolini<sup>6</sup>

## Affiliations

*1 Postdoctoral fellow of the Research Foundation – Flanders (FWO), Department of Archaeology, KU Leuven, Celestijnenlaan 200e, 3001 Leuven, Belgium*

*2 Institute of Advanced Studies, University of Bologna, Via Marsala 26, 40126 Bologna, Italy*

*3 UMR CNRS 7194, Département Homme et Environnement, Muséum national d'Histoire naturelle – Université de Perpignan Via Domitia – Sorbonne Université, Institut de Paléontologie Humaine, 1 rue Panhard, 75013 Paris, France*

*4 Centre français des études éthiopiennes, P.O. Box 5554, Addis Ababa, Ethiopia*

*5 ISEM, Univ Montpellier, CNRS, EPHE, IRD, Montpellier, France*

*6 Department of Cultural Heritage, University of Bologna, Via degli Ariani 1  
48121 Ravenna, Italy*

\* Corresponding authors: [alice.leplongeon@kuleuven.be](mailto:alice.leplongeon@kuleuven.be), [clement.menard@cfee.cnrs.fr](mailto:clement.menard@cfee.cnrs.fr)

# These authors contributed equally to this work

Supplementary Material 1. List of variables recorded and their definitions

|                          | Name of attribute          | Coding        | Data type                                                         | Values                     | Definition attribute and values                                                                                         |
|--------------------------|----------------------------|---------------|-------------------------------------------------------------------|----------------------------|-------------------------------------------------------------------------------------------------------------------------|
| Contextual data          | ID                         | ID            | integer                                                           |                            | unique ID                                                                                                               |
|                          | Site                       | SITE          | categorical                                                       | B1s1, DW2s2, Dw2s3, GB, MB | GB= Goda Buticha; MB=Mochena Borago                                                                                     |
|                          | Stratigraphy               | STRAT         | categorical                                                       | text                       |                                                                                                                         |
|                          | Site area                  | SITE AREA     | categorical                                                       | text                       | excavation square, if available                                                                                         |
|                          | Artefact number            | ARTEFACT_NO   | integer                                                           |                            | artefact number                                                                                                         |
| Assemblage               | GROUPING                   | categorical   | B1s1_Lower, B1s1_Upper, Dw2s2, Dw2s3, GB_IIC, GB_I, MB_3010, MB_7 | Site + layer               |                                                                                                                         |
| Chronology               | CHRONO                     | categorical   | Late Glacial, Early Holocene, Mid-Holocene, Late Holocene         |                            |                                                                                                                         |
| Basic attributes         | Completeness               | COMPLETENES S | boolean                                                           | COMPLETE, SUB              | Sub refers to sub-complete, and corresponds to micro-fragmented backed pieces (estimated break <1/10th of total length) |
|                          | Raw material               | RM            | categorical                                                       | OBS, CHERT, CHAL, BAS      | Obsidian, Chert, Chalcedony, Basalt                                                                                     |
| Morphometrical variables | Weight                     | WEIGHT        | decimal                                                           |                            | taken with 1 decimal, using the same scales (in g)                                                                      |
|                          | Length                     | LENGTH        | decimal                                                           |                            | Maximal dimension, recorded with 2 decimals (in mm)                                                                     |
|                          | Width                      | WIDTH         | decimal                                                           |                            | Maximal width, perpendicular to the maximal dimension, recorded with 2 decimals (in mm)                                 |
|                          | Thickness                  | TMAX          | decimal                                                           |                            | Maximal thickness recorded with 2 decimals (in mm)                                                                      |
|                          | Thickness at Maximal Width | TWL           | decimal                                                           |                            | Maximal thickness, perpendicular to maximal width, recorded with 2 decimals (in mm)                                     |
|                          | Elongation index           | LW            | decimal                                                           |                            | Ratio length / width                                                                                                    |
| Flatteness index         | WT                         | decimal       |                                                                   | Ratio width / thickness    |                                                                                                                         |

|                             | Name of attribute       | Coding                                           | Data type       | Values                                        | Definition attribute and values                                                                         |
|-----------------------------|-------------------------|--------------------------------------------------|-----------------|-----------------------------------------------|---------------------------------------------------------------------------------------------------------|
|                             | Transversal symmetry    | <b>SYMM</b><br>( <b>TRANSV_SYM</b> in raw data)  | boolean         | YES, NO                                       | Symmetry observed when considering an axis perpendicular to the longest morphological axis of the piece |
| <b>Blank selection</b>      | Curvature               | <b>CURVATURE</b>                                 | categorical     | CURVED, FLAT, SIN, SLIGHT                     | Curvature of the longitudinal profile: Curved, Flat, Sinuous, slightly curved                           |
|                             | Twisting                | <b>TWISTING</b>                                  | boolean         | YES, NO                                       | Twisting (lateral profile): Twisted (Yes) / Flat (No)                                                   |
|                             | Angle of opposed edge   | <b>OPPEDGE</b><br>( <b>OE_ANGLE</b> in raw data) | boolean         | SHARP, STEEP                                  | Sharp <45 degrees, Steep >45 degrees                                                                    |
| <b>Blank transformation</b> | Proximal back thickness | <b>BK_T_PROX</b>                                 | decimal         |                                               | Thickness of the back at 25% of the max dimension, recorded with 2 decimals (in mm)                     |
|                             | Mesial back thickness   | <b>BK_T_MES</b>                                  | decimal         |                                               | Thickness of the back at 50% of the max dimension, recorded with 2 decimals (in mm)                     |
|                             | Distal back thickness   | <b>BK_T_DIST</b>                                 | decimal         |                                               | Thickness of the back at 75% of the max dimension, recorded with 2 decimals (in mm)                     |
|                             | Mean back thickness     | <b>BKMean</b>                                    | decimal         |                                               | $(BK\_T\_PROX + BK\_T\_MES + BK\_T\_DIST)/3$                                                            |
|                             | Relative back thickness | <b>BKTrel</b>                                    | decimal         |                                               | Ratio BKMean / TMAX                                                                                     |
|                             | Butt                    | <b>BUTT</b>                                      | categorical     | PART REM (PRES RET), PRES, REM (ABS RET, ABS) | Partially removed (Retouched but present), Present, Removed (Absent because retouched, Absent)          |
|                             | Bulb                    | <b>BULB</b>                                      | categorical     | YES, NO                                       | Present, Removed                                                                                        |
|                             | Back location           | <b>LOC BK</b><br>( <b>LOCATION</b> in raw data)  | categorical     | TOT, PARTIAL, ALMOST                          | Back affects the whole edge, proximal or distal part only, almost the whole edge                        |
| Back retouch type           | <b>RET TYPE</b>         | categorical                                      | ALT, CROSS, DIR | Alternate, Crossed, Direct                    |                                                                                                         |

|              | <b>Name of attribute</b>     | <b>Coding</b>    | <b>Data type</b> | <b>Values</b>       | <b>Definition attribute and values</b> |
|--------------|------------------------------|------------------|------------------|---------------------|----------------------------------------|
| <b>Other</b> | Edge transformation / damage | <b>OE TRANSF</b> | categorical      | CONT, DISCONT, NONE | Continuous, Discontinuous, none        |
