# Supplementary material for: Backed Pieces and Their Variability in the Later Stone Age of the Horn of Africa
Source: Springer Nature journal article supplement (doi:10.1007/s10437-020-09401-x), 2020-09-01
Supplement: MOESM5 [file 10437_2020_9401_MOESM5_ESM.pdf]

# Backed pieces and their variability in the Later Stone Age of the Horn of Africa

Alice Leplongeon<sup>1,2,3\*#</sup>

Clément Ménard<sup>4\*#</sup>

Vincent Bonhomme<sup>5</sup>

Eugenio Bortolini<sup>6</sup>

## Affiliations

*1 Postdoctoral fellow of the Research Foundation – Flanders (FWO), Department of Archaeology, KU Leuven, Celestijnenlaan 200e, 3001 Leuven, Belgium*

*2 Institute of Advanced Studies, University of Bologna, Via Marsala 26, 40126 Bologna, Italy*

*3 UMR CNRS 7194, Département Homme et Environnement, Muséum national d'Histoire naturelle – Université de Perpignan Via Domitia – Sorbonne Université, Institut de Paléontologie Humaine, 1 rue Panhard, 75013 Paris, France*

*4 Centre français des études éthiopiennes, P.O. Box 5554, Addis Ababa, Ethiopia*

*5 ISEM, Univ Montpellier, CNRS, EPHE, IRD, Montpellier, France*

*6 Department of Cultural Heritage, University of Bologna, Via degli Ariani 1  
48121 Ravenna, Italy*

\* Corresponding authors: [alice.leplongeon@kuleuven.be](mailto:alice.leplongeon@kuleuven.be), [clement.menard@cfee.cnrs.fr](mailto:clement.menard@cfee.cnrs.fr)

# These authors contributed equally to this work

Kruskal-Wallis (KW) rank sum test: assemblage by weight

|                       |          |
|-----------------------|----------|
| <b>KW chi-squared</b> | 72.115   |
| <b>p-value</b>        | 5.52E-13 |

Mann-Whitney (MW) pair-wise tests, with Bonferoni correction of the p-value

|            |                  | B1s1_Lower | B1s1_Upper | DW2s2AB | DW2s3    | GBIIC | MB_3010 | MB_7  | GBI |
|------------|------------------|------------|------------|---------|----------|-------|---------|-------|-----|
| B1s1_Lower | M-W statistic    | NA         |            |         |          |       |         |       |     |
|            | M-W corr. Pvalue | NA         |            |         |          |       |         |       |     |
| B1s1_Upper | M-W statistic    | 9.5        | NA         |         |          |       |         |       |     |
|            | M-W corr. Pvalue | 0.0008     |            |         |          |       |         |       |     |
| DW2s2AB    | M-W statistic    | 28         | 207        | NA      |          |       |         |       |     |
|            | M-W corr. Pvalue | 1          | 0.2180     |         |          |       |         |       |     |
| DW2s3      | M-W statistic    | 2          | 72         | 24.5    | NA       |       |         |       |     |
|            | M-W corr. Pvalue | 1.48E-05   | 1.68E-05   | 0.0003  |          |       |         |       |     |
| GBIIC      | M-W statistic    | 24.5       | 300        | 77.5    | 516.5    | NA    |         |       |     |
|            | M-W corr. Pvalue | 0.0197     | 1          | 1       | 9.42E-06 |       |         |       |     |
| MB_3010    | M-W statistic    | 58.5       | 750.5      | 185     | 1178.5   | 544.5 | NA      |       |     |
|            | M-W corr. Pvalue | 0.0069     | 0.3877     | 1       | 3.05E-09 | 1     |         |       |     |
| MB_7       | M-W statistic    | 21.5       | 449        | 93.5    | 794      | 315.5 | 574     | NA    |     |
|            | M-W corr. Pvalue | 0.0010     | 1          | 0.4832  | 2.40E-06 | 1     | 1       |       |     |
| GBI        | M-W statistic    | 16         | 220        | 53.5    | 404.5    | 167   | 300     | 272.5 | NA  |
|            | M-W corr. Pvalue | 0.0222     | 1          | 1       | 1.31E-05 | 1     | 1       | 1     |     |

Kruskal-Wallis (KW) rank sum test: assemblage by length

|                       |          |
|-----------------------|----------|
| <b>KW chi-squared</b> | 66.608   |
| <b>p-value</b>        | 7.14E-12 |

Mann-Whitney (MW) pair-wise tests, with Bonferoni correction of the p-value

|                          | B1s1_Lower | B1s1_Upper | DW2s2AB | DW2s3  | GBIIC | MB_3010 | MB_7 | GBI |
|--------------------------|------------|------------|---------|--------|-------|---------|------|-----|
| B1s1_Lower M-W statistic | NA         |            |         |        |       |         |      |     |
| M-W corr. Pvalue         | NA         |            |         |        |       |         |      |     |
| B1s1_Upper M-W statistic | 8          | NA         |         |        |       |         |      |     |
| M-W corr. Pvalue         | 0.0007     | NA         |         |        |       |         |      |     |
| DW2s2AB M-W statistic    | 46         | 221.5      | NA      |        |       |         |      |     |
| M-W corr. Pvalue         | 1          | 0.0437     | NA      |        |       |         |      |     |
| DW2s3 M-W statistic      | 8          | 101        | 18      | NA     |       |         |      |     |
| M-W corr. Pvalue         | 0.0004     | 0.0007     | 0.0008  | NA     |       |         |      |     |
| GBIIC M-W statistic      | 15.5       | 232        | 37      | 457.5  | NA    |         |      |     |
| M-W corr. Pvalue         | 0.0047     | 1          | 0.0551  | 0.0087 | NA    |         |      |     |
| MB_3010 M-W statistic    | 47         | 660.5      | 114     | 1083   | 603.5 | NA      |      |     |
| M-W corr. Pvalue         | 0.0026     | 1          | 0.1427  | 0.0000 | 1     | NA      |      |     |
| MB_7 M-W statistic       | 18         | 358.5      | 54.5    | 732    | 349   | 547     | NA   |     |
| M-W corr. Pvalue         | 0.0007     | 1          | 0.0169  | 0.0006 | 1     | 0.9938  | NA   |     |
| GBI M-W statistic        | 20         | 119        | 23.5    | 351.5  | 144   | 185     | 185  | NA  |
| M-W corr. Pvalue         | 0.0480     | 1          | 0.0444  | 0.0194 | 1     | 0.0930  | 1    | NA  |

Kruskal-Wallis (KW) rank sum test: assemblage by width

|                       |          |
|-----------------------|----------|
| <b>KW chi-squared</b> | 69.12    |
| <b>p-value</b>        | 2.23E-12 |

Mann-Whitney (MW) pair-wise tests, with Bonferoni correction of the p-value

|            |                  | B1s1_Lower | B1s1_Upper | DW2s2AB | DW2s3    | GBIIC | MB_3010 | MB_7  | GBI |
|------------|------------------|------------|------------|---------|----------|-------|---------|-------|-----|
| B1s1_Lower | M-W statistic    | NA         |            |         |          |       |         |       |     |
|            | M-W corr. Pvalue | NA         |            |         |          |       |         |       |     |
| B1s1_Upper | M-W statistic    | 14.5       | NA         |         |          |       |         |       |     |
|            | M-W corr. Pvalue | 0.0020     |            |         |          |       |         |       |     |
| DW2s2AB    | M-W statistic    | 22         | 138        | NA      |          |       |         |       |     |
|            | M-W corr. Pvalue | 0.6189     | 1          |         |          |       |         |       |     |
| DW2s3      | M-W statistic    | 2          | 34.5       | 16.5    | NA       |       |         |       |     |
|            | M-W corr. Pvalue | 0.0002     | 1.36E-06   | 0.0006  |          |       |         |       |     |
| GBIIC      | M-W statistic    | 28.5       | 191.5      | 86.5    | 520      | NA    |         |       |     |
|            | M-W corr. Pvalue | 0.0368     | 1          | 1       | 2.59E-05 |       |         |       |     |
| MB_3010    | M-W statistic    | 71         | 513        | 229.5   | 1165.5   | 570   | NA      |       |     |
|            | M-W corr. Pvalue | 0.0195     | 1          | 1       | 1.42E-08 | 1     |         |       |     |
| MB_7       | M-W statistic    | 16.5       | 277        | 139.5   | 818      | 363   | 633.5   | NA    |     |
|            | M-W corr. Pvalue | 0.0006     | 1          | 1       | 9.00E-07 | 1     | 1       |       |     |
| GBI        | M-W statistic    | 17         | 172.5      | 81      | 404      | 199.5 | 371     | 314.5 | NA  |
|            | M-W corr. Pvalue | 0.0274     | 1          | 1       | 6.82E-05 | 1     | 1       | 1     |     |

Kruskal-Wallis (KW) rank sum test: assemblage by thickness

|                       |          |
|-----------------------|----------|
| <b>KW chi-squared</b> | 80.144   |
| <b>p-value</b>        | 1.29E-14 |

Mann-Whitney (MW) pair-wise tests, with Bonferoni correction of the p-value

|                          | B1s1_Lower | B1s1_Upper | DW2s2AB | DW2s3    | GBIIC  | MB_3010 | MB_7   | GBI |
|--------------------------|------------|------------|---------|----------|--------|---------|--------|-----|
| B1s1_Lower M-W statistic | NA         |            |         |          |        |         |        |     |
| M-W corr. Pval           | NA         |            |         |          |        |         |        |     |
| B1s1_Upper M-W statistic | 18.5       | NA         |         |          |        |         |        |     |
| M-W corr. Pval           | 0.0370     | NA         |         |          |        |         |        |     |
| DW2s2AB M-W statistic    | 41         | 215.5      | NA      |          |        |         |        |     |
| M-W corr. Pval           | 1          | 0.0881     | NA      |          |        |         |        |     |
| DW2s3 M-W statistic      | 7          | 133.5      | 25      | NA       |        |         |        |     |
| M-W corr. Pval           | 0.0004     | 0.0093     | 0.0021  | NA       |        |         |        |     |
| GBIIC M-W statistic      | 65.5       | 425        | 105     | 533.5    | NA     |         |        |     |
| M-W corr. Pval           | 1          | 0.0024     | 1       | 5.93E-06 | NA     |         |        |     |
| MB_3010 M-W statistic    | 128        | 903        | 229     | 1164.5   | 479    | NA      |        |     |
| M-W corr. Pval           | 0.8329     | 0.0004     | 1       | 1.49E-08 | 1      | NA      |        |     |
| MB_7 M-W statistic       | 49         | 497.5      | 104     | 755.5    | 177    | 442.5   | NA     |     |
| M-W corr. Pval           | 0.0248     | 1          | 1       | 0.0001   | 0.0752 | 0.0467  | NA     |     |
| GBI M-W statistic        | 57.5       | 350.5      | 93.5    | 416      | 192.5  | 422     | 433.5  | NA  |
| M-W corr. Pval           | 1          | 0.0004     | 1       | 1.47E-05 | 1      | 1       | 0.0086 | NA  |

Kruskal-Wallis (KW) rank sum test: assemblage by elongation index

|                       |          |
|-----------------------|----------|
| <b>KW chi-squared</b> | 46.65    |
| <b>p-value</b>        | 6.54E-08 |

Mann-Whitney (MW) pair-wise tests, with Bonferoni correction of the p-value

|                          | B1s1_Lower | B1s1_Upper | DW2s2AB | DW2s3  | GBIIC | MB_3010 | MB_7  | GBI |
|--------------------------|------------|------------|---------|--------|-------|---------|-------|-----|
| B1s1_Lower M-W statistic | NA         |            |         |        |       |         |       |     |
| M-W corr. Pval           | NA         |            |         |        |       |         |       |     |
| B1s1_Upper M-W statistic | 106        | NA         |         |        |       |         |       |     |
| M-W corr. Pval           | 1          | NA         |         |        |       |         |       |     |
| DW2s2AB M-W statistic    | 92         | 225.5      | NA      |        |       |         |       |     |
| M-W corr. Pval           | 0.2845     | 0.0266     | NA      |        |       |         |       |     |
| DW2s3 M-W statistic      | 247        | 588.5      | 151     | NA     |       |         |       |     |
| M-W corr. Pval           | 0.0038     | 1.76E-05   | 1       | NA     |       |         |       |     |
| GBIIC M-W statistic      | 99.5       | 258        | 55      | 119    | NA    |         |       |     |
| M-W corr. Pval           | 1          | 1          | 0.4840  | 0.0183 | NA    |         |       |     |
| MB_3010 M-W statistic    | 273        | 703.5      | 111.5   | 235.5  | 548.5 | NA      |       |     |
| M-W corr. Pval           | 1          | 1          | 0.1219  | 0.0003 | 1     | NA      |       |     |
| MB_7 M-W statistic       | 189        | 494.5      | 74.5    | 157    | 383   | 734     | NA    |     |
| M-W corr. Pval           | 1          | 1          | 0.1089  | 0.0005 | 1     | 1       | NA    |     |
| GBI M-W statistic        | 56         | 146        | 23      | 38     | 136.5 | 231.5   | 168.5 | NA  |
| M-W corr. Pval           | 1          | 1          | 0.0407  | 0.0002 | 1     | 0.8025  | 1     | NA  |

Kruskal-Wallis (KW) rank sum test: assemblage by flattening index

|                       |          |
|-----------------------|----------|
| <b>KW chi-squared</b> | 39.5     |
| <b>p-value</b>        | 1.57E-06 |

Mann-Whitney (MW) pair-wise tests, with Bonferoni correction of the p-value

|                          | B1s1_Lower | B1s1_Upper | DW2s2AB | DW2s3 | GBIIC  | MB_3010 | MB_7   | GBI |
|--------------------------|------------|------------|---------|-------|--------|---------|--------|-----|
| B1s1_Lower M-W statistic | NA         |            |         |       |        |         |        |     |
| M-W corr. Pval           | NA         |            |         |       |        |         |        |     |
| B1s1_Upper M-W statistic | 167        | NA         |         |       |        |         |        |     |
| M-W corr. Pval           | 1          | NA         |         |       |        |         |        |     |
| DW2s2AB M-W statistic    | 35.5       | 49.5       | NA      |       |        |         |        |     |
| M-W corr. Pval           | 1          | 0.0999     | NA      |       |        |         |        |     |
| DW2s3 M-W statistic      | 91.5       | 155        | 146.5   | NA    |        |         |        |     |
| M-W corr. Pval           | 1          | 0.0413     | 1       | NA    |        |         |        |     |
| GBIIC M-W statistic      | 43         | 49.5       | 95      | 248.5 | NA     |         |        |     |
| M-W corr. Pval           | 0.2619     | 0.0001     | 1       | 1     | NA     |         |        |     |
| MB_3010 M-W statistic    | 134.5      | 152.5      | 267.5   | 655   | 615    | NA      |        |     |
| M-W corr. Pval           | 1          | 2.22E-05   | 1       | 1     | 1      | NA      |        |     |
| MB_7 M-W statistic       | 135.5      | 197        | 220.5   | 534.5 | 502    | 935     | NA     |     |
| M-W corr. Pval           | 1          | 0.0374     | 1       | 1     | 0.1667 | 1       | NA     |     |
| GBI M-W statistic        | 28         | 32.5       | 74.5    | 182.5 | 160.5  | 259.5   | 131    | NA  |
| M-W corr. Pval           | 0.1857     | 0.0003     | 1       | 1     | 1      | 1       | 0.1323 | NA  |

Kruskal-Wallis (KW) rank sum test: assemblage by relative back thickness index

|                       |          |
|-----------------------|----------|
| <b>KW chi-squared</b> | 34.82    |
| <b>p-value</b>        | 1.21E-05 |

Mann-Whitney (MW) pair-wise tests, with Bonferoni correction of the p-value

|            |                  | B1s1_Lower | B1s1_Upper | DW2s2AB | DW2s3  | GBIIC | MB_3010 | MB_7   | GBI |
|------------|------------------|------------|------------|---------|--------|-------|---------|--------|-----|
| B1s1_Lower | M-W statistic    | NA         |            |         |        |       |         |        |     |
|            | M-W corr. Pvalue | NA         |            |         |        |       |         |        |     |
| B1s1_Upper | M-W statistic    | 139        | NA         |         |        |       |         |        |     |
|            | M-W corr. Pvalue | 1          |            |         |        |       |         |        |     |
| DW2s2AB    | M-W statistic    | 40         | 82         | NA      |        |       |         |        |     |
|            | M-W corr. Pvalue | 1          | 1          |         |        |       |         |        |     |
| DW2s3      | M-W statistic    | 133        | 278        | 186.5   | NA     |       |         |        |     |
|            | M-W corr. Pvalue | 1          | 1          | 1       |        |       |         |        |     |
| GBIIC      | M-W statistic    | 160        | 340        | 193     | 423    | NA    |         |        |     |
|            | M-W corr. Pvalue | 0.5957     | 1          | 0.0630  | 0.1082 |       |         |        |     |
| MB_3010    | M-W statistic    | 346        | 722        | 419     | 918    | 452.5 | NA      |        |     |
|            | M-W corr. Pvalue | 0.3773     | 1          | 0.0229  | 0.0197 | 1     |         |        |     |
| MB_7       | M-W statistic    | 261        | 567        | 311     | 698.5  | 383.5 | 886     | NA     |     |
|            | M-W corr. Pvalue | 0.1692     | 0.1640     | 0.0132  | 0.0049 | 1     | 1       |        |     |
| GBI        | M-W statistic    | 108        | 218        | 130     | 279    | 117.5 | 279     | 164    | NA  |
|            | M-W corr. Pvalue | 1          | 1          | 1       | 1      | 1     | 1       | 0.9490 |     |
