# Supplementary material for: Backed Pieces and Their Variability in the Later Stone Age of the Horn of Africa
Source: Springer Nature journal article supplement (doi:10.1007/s10437-020-09401-x), 2020-09-01
Supplement: MOESM6 [file 10437_2020_9401_MOESM6_ESM.pdf]

# Backed pieces and their variability in the Later Stone Age of the Horn of Africa

Alice Leplongeon<sup>1,2,3\*#</sup>

Clément Ménard<sup>4#</sup>

Vincent Bonhomme<sup>5</sup>

Eugenio Bortolini<sup>6</sup>

## Affiliations

*1 Postdoctoral fellow of the Research Foundation – Flanders (FWO), Department of Archaeology, KU Leuven, Celestijnenlaan 200e, 3001 Leuven, Belgium*

*2 Institute of Advanced Studies, University of Bologna, Via Marsala 26, 40126 Bologna, Italy*

*3 UMR CNRS 7194, Département Homme et Environnement, Muséum national d'Histoire naturelle – Université de Perpignan Via Domitia – Sorbonne Université, Institut de Paléontologie Humaine, 1 rue Panhard, 75013 Paris, France*

*4 Centre français des études éthiopiennes, P.O. Box 5554, Addis Ababa, Ethiopia*

*5 ISEM, Univ Montpellier, CNRS, EPHE, IRD, Montpellier, France*

*6 Department of Cultural Heritage, University of Bologna, Via degli Ariani 1  
48121 Ravenna, Italy*

\* Corresponding authors: [alice.leplongeon@kuleuven.be](mailto:alice.leplongeon@kuleuven.be), [clement.menard@cfee.cnrs.fr](mailto:clement.menard@cfee.cnrs.fr)

# These authors contributed equally to this work

### Outlines / Assemblages

data\_eft %>% PCA %>% as\_df(retain=2) %>% adonis(PC1+PC2~GROUPING, data=., method="euclidean")

Permutation: free

Number of permutations: 999

Terms added sequentially (first to last)

|           | Df  | SumsOfSqs | MeanSqs    | F.Model | R2      | Pr(>F) |
|-----------|-----|-----------|------------|---------|---------|--------|
| GROUPING  | 7   | 0.15537   | 2.221955   | 7.8868  | 0.26139 | 0.001  |
| Residuals | 156 | 0.43903   | 0.00228143 |         | 0.73861 |        |
| Total     | 163 | 0.59439   |            |         | 1.0000  |        |

### Outlines / Chronology

data\_eft %>% PCA %>% as\_df(retain=2) %>% adonis(PC1+PC2~CHRONO, data=., method="euclidean")

Permutation: free

Number of permutations: 999

Terms added sequentially (first to last)

|           | Df  | SumsOfSqs | MeanSqs | F.Model | R2      | Pr(>F) |
|-----------|-----|-----------|---------|---------|---------|--------|
| GROUPING  | 3   | 0.12723   | 0.04241 | 14.525  | 0.21405 | 0.001  |
| Residuals | 160 | 0.46716   | 0.00292 |         | 0.78595 |        |
| Total     | 163 | 0.59439   |         |         | 1.0000  |        |

### Open curves / Assemblages

data\_left %>% PCA %>% as\_df(retain=2) %>% adonis(PC1+PC2~GROUPING, data=., method="euclidean")

Permutation: free

Number of permutations: 999

Terms added sequentially (first to last)

|           | Df  | SumsOfSqs | MeanSqs | F.Model | R2     | Pr(>F) |
|-----------|-----|-----------|---------|---------|--------|--------|
| GROUPING  | 7   | 8.679     | 1.23989 | 7.3297  | 0.2475 | 0.001  |
| Residuals | 156 | 26.389    | 0.16916 |         | 0.7525 |        |
| Total     | 163 | 35.068    |         |         | 1.0000 |        |

### Open curves / Chronology

data\_left %>% PCA %>% as\_df(retain=2) %>% adonis(PC1+PC2~CHRONO, data=., method="euclidean")

Permutation: free

Number of permutations: 999

Terms added sequentially (first to last)

|           | Df  | SumsOfSqs | MeanSqs | F.Model | R2      | Pr(>F) |
|-----------|-----|-----------|---------|---------|---------|--------|
| GROUPING  | 3   | 6.660     | 2.22012 | 12.504  | 0.18993 | 0.001  |
| Residuals | 160 | 28.408    | 0.17755 |         | 0.81007 |        |
| Total     | 163 | 35.068    |         |         | 1.0000  |        |
